# Supplementary material
Source: publisher site journal article supplement (https://www.e-cmh.org/upload/media/cmh-2023-0449-Supplementary-Fig-7.pdf)
Supplement: Supplementary file 1 [file cmh-2023-0449-Supplementary-Fig-7.pdf]

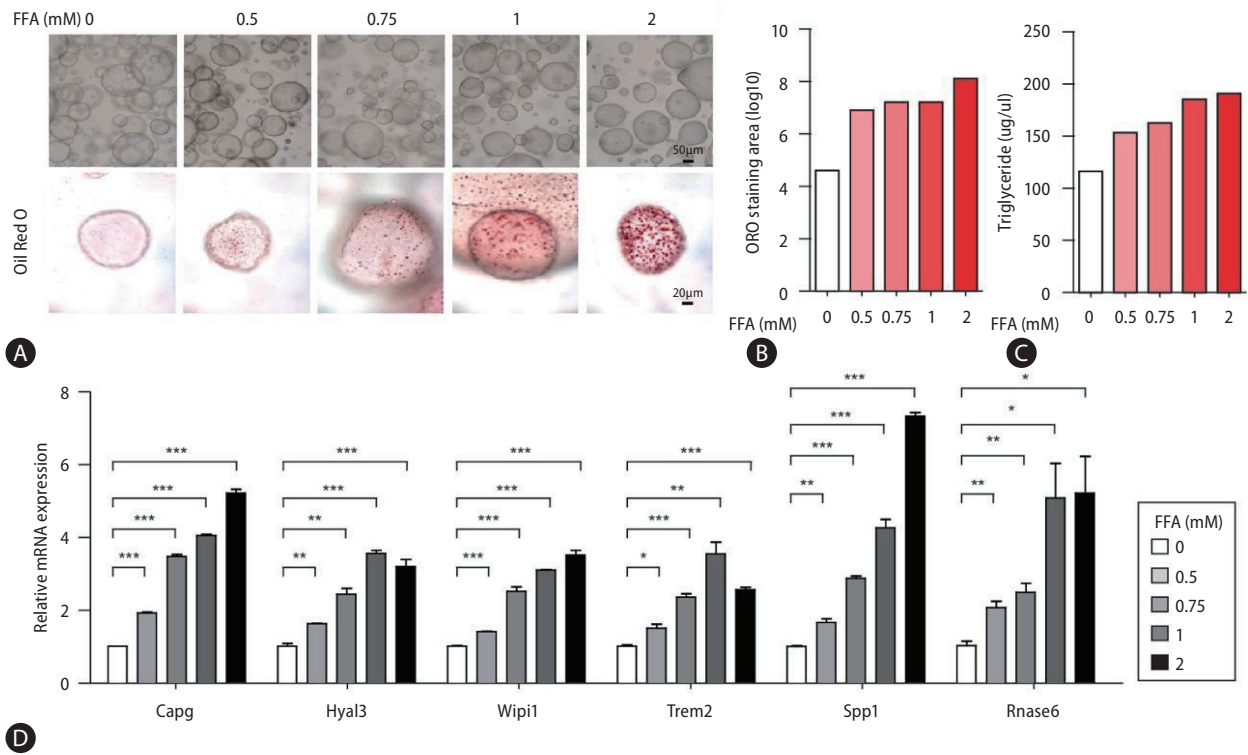

**Supplementary Fig. 7.** FFA concentration dependent effects of mouse hepatic organoids. (A) Representative bright-field images showing morphological changes in hepatic organoid treated with each concentration of FFA (Top). Oil Red O staining showing lipid accumulation in organoids treated with FFA (Bottom). (B) Quantification graph showing the Oil Red O staining area using Image J software. (C) Lipid content measured by intracellular triglyceride assay. (D) Relative mRNA expression levels of 6 signature gene set in organoid treated with FFA (Student's *t*-test, *P*-value; \* $<0.05$ , \*\* $<0.01$ , \*\*\* $<0.001$ ).
